# Supplementary material for: p63 control of desmosome gene expression and adhesion is compromised in AEC syndrome
Source: PubMed Central journal article supplement — Hum Mol Genet. 2012 Oct 29;22(3):531–43. doi: 10.1093/hmg/dds464 (PMC3542863; doi:10.1093/hmg/dds464), 2012-10-29
Supplement: supp_dds464_dds464supp.pdf [file supp_dds464_dds464supp.pdf]

## **Supplemental data**

**p63 control of desmosome gene expression and adhesion is compromised in AEC syndrome.**

Giustina Ferone, Maria Rosaria Mollo, Helen A. Thomason, Dario Antonini, Huiqing Zhou, Raffaele Ambrosio, Laura De Rosa, Domenico Salvatore, Spiro Getsios, Hans van Bokhoven, Jill Dixon, and Caterina Missero.

## Supplemental Figures

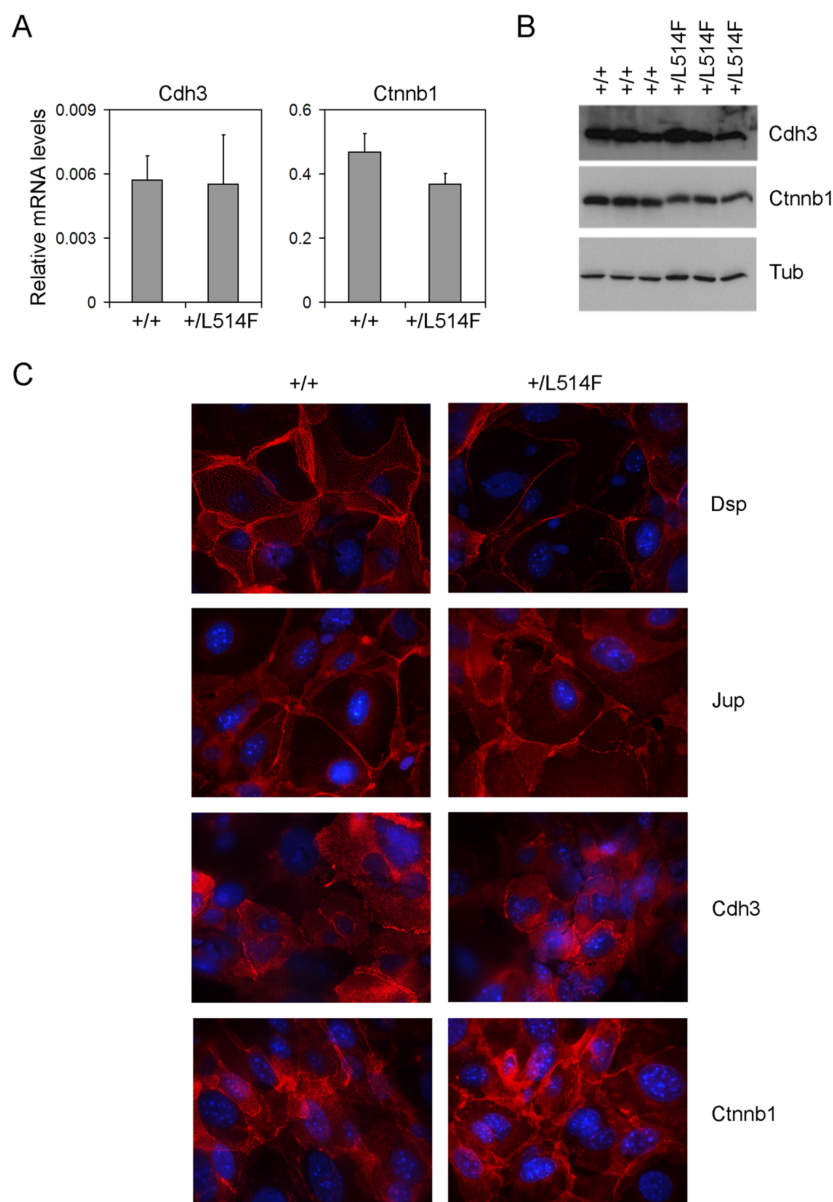

**Supplemental Figure 1.** Cell adhesion components are not affected in AEC mutant keratinocytes and epidermis. (A) Real time RT-PCR on RNA isolated from embryonic skin at E.14.5 from mutant (white bars) and control embryos (grey bars). Data are normalized for  $\beta$ -actin mRNA levels, and are represented as mean of three independent biological samples  $\pm$  SD. (B) Immunoblotting of the indicated adherens junction proteins in wild-type (+/+) and AEC mutant (+/L514F) newborn epidermis. Tubulin antibodies (Sigma) were used as normalization control. (C) Immunofluorescence for the indicated adherens junction and desmosomal proteins

was performed on methanol fixed differentiated primary keratinocytes derived from wt and +/L514F mice.

A

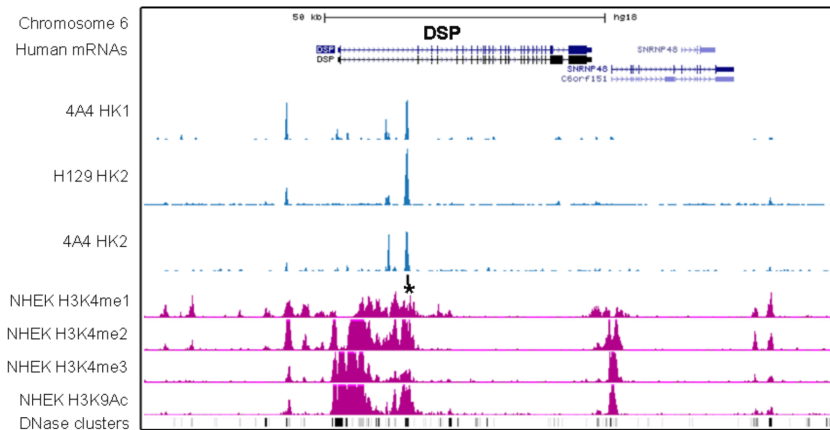

B

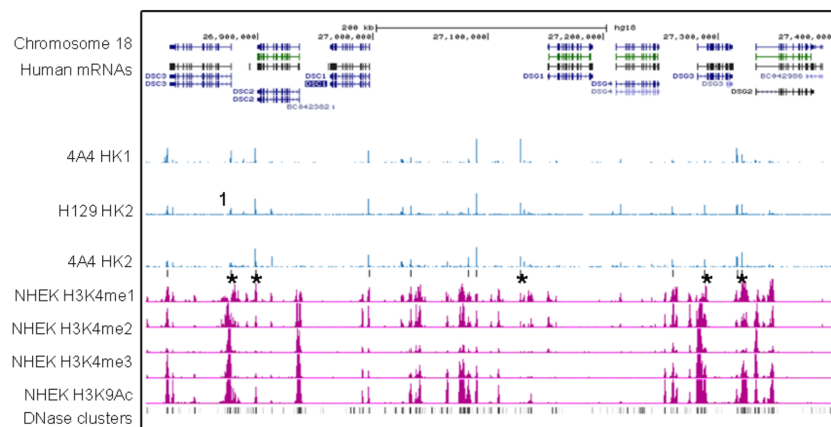

**Supplemental Figure 2.** The position of the p63 binding regions in the *Dsp* and in the desmosomal cadherin genomic loci was obtained in human primary keratinocytes by ChIP-seq using 4A4 and H129 antibodies (56). Genomic regions enriched for H3K4me and DNase clusters are ENCODE consortium data (57, 58). p63-binding regions corresponding to the mouse genomic regions tested in this study are indicated with \*.

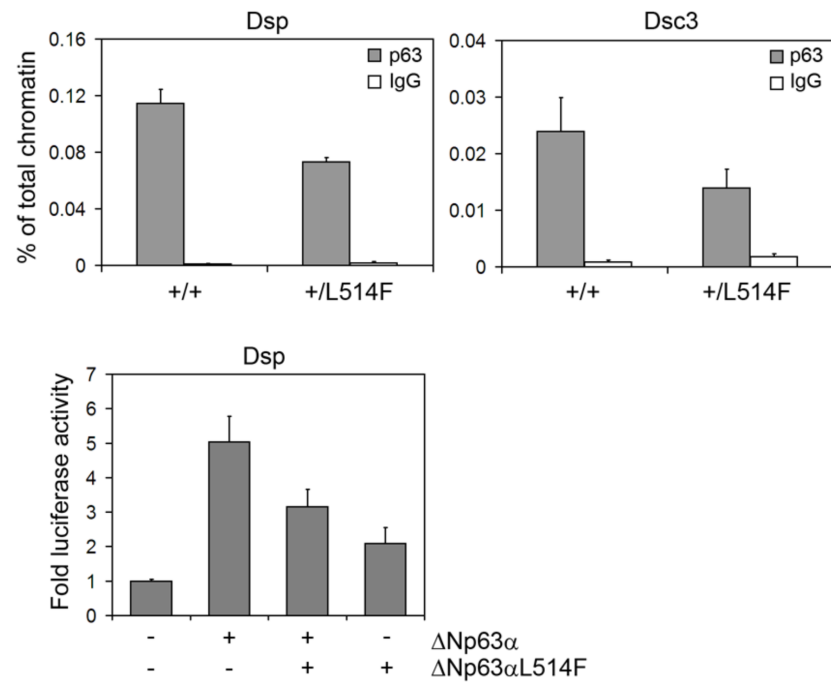

**Supplemental Figure 3.** AEC mutations affect both DNA binding and transactivation activities. (A) ChIP assay from wild-type and p63+/L514F embryonic skin (E14.5) was performed using p63 polyclonal antibodies (H-129) (grey bars) and rabbit IgG (white bars) as negative control. A reduction in p63 binding was observed in mutant skin compared the wild-type counterpart. Error bars denote SEM. These data are representative of two independent experiments (B) Luciferase assay in H1299 cells transfected with  $\Delta Np63\alpha$  or  $\Delta Np63\alpha L514F$  expressing vectors and Dsp luciferase reporter. Error bars denote SEM.

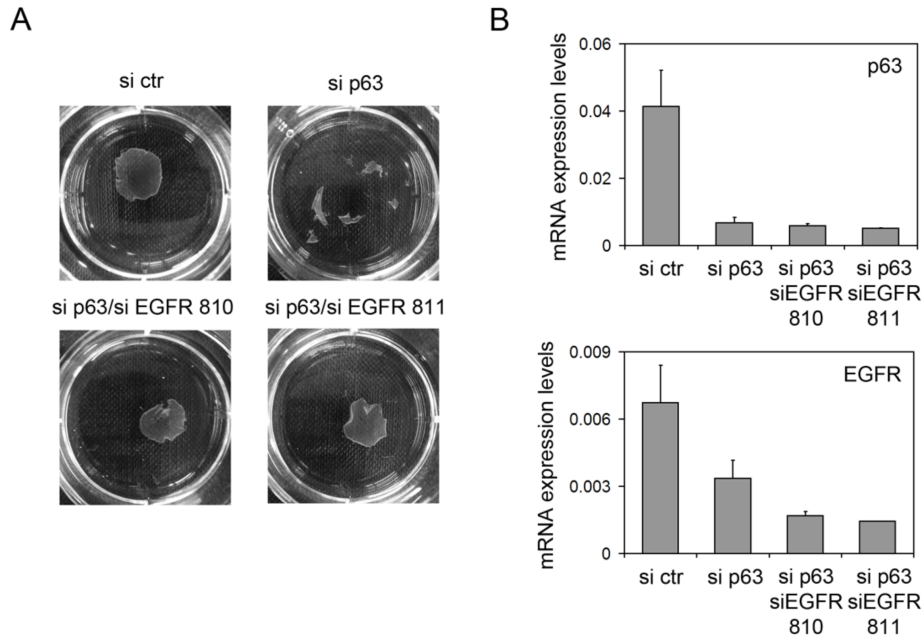

**Supplemental Figure 4.** EGFR knockdown restores mechanical resistance to p63 depleted keratinocytes. (A) Wild-type mouse keratinocytes were transfected with siRNA for p63 (sip63) and EGFR (EgfrMSS203810, EgfrMSS203811, Invitrogen) or control (siCTR) as indicated. Twenty-four hours after transfection, cells were treated with 0.6mM calcium for additional 24 hrs. Cells were detached as a monolayer with dispase. Monolayers were subjected to mechanical stress, and resulting fragments of the cell sheet were imaged. (B) p63 (upper panel) and EGFR (lower panel) expression were measured by real time RT-PCR on RNA isolated from samples in (A). Data are normalized for actin mRNA levels and are represented as mean  $\pm$  SD normalized mRNA levels.

## **Supplemental Methods**

### **Immunofluorescence analysis on cells.**

Mouse primary keratinocytes were seeded onto acid-washed collagen coating glass coverslips, grown for seven days and then treated with 0.6mM Ca<sup>2+</sup> for 24h. Coverslips were rinsed in PBS and fixed in methanol. Indirect immunofluorescence was performed using anti Dsp (1:100), Jup (1:100), mouse anti  $\beta$ -catenin (BD Transduction Laboratories; 1:100), and rat anti P-cadherin (Invitrogen; 1:50) antibodies. Secondary antibodies used for immunofluorescence staining were Alexa Fluor 488 goat anti-mouse, rabbit or chicken (Invitrogen). Images were captured using Zeiss Axioskop2 plus image microscope.

## Supplemental tables

**Table 1. p63 binding regions tested by ChIP.**

| Gene     | Chrom. | Position of the p63-binding region | NCBI release |
|----------|--------|------------------------------------|--------------|
| hDSP     | 6      | 7,498,979-7,499,303                | NCBI36/hg18  |
| mDsp     | 13     | 38,254,755-38,254,974              | NCBI37/mm9   |
| hDSC3    | 18     | 26,898,025-26,898,495              | NCBI36/hg18  |
| mDsc3    | 18     | 20,185,228-20,185,440              | NCBI37/mm9   |
| hDSC3(2) | 18     | 26,876,703-26,877,063              | NCBI36/hg18  |
| mDsc3(2) | 18     | 20,160,526-20,160,774              | NCBI37/mm9   |
| hDSG1    | 18     | 27,128,313-27,128,654              | NCBI36/hg18  |
| mDsg1    | 18     | 27,128,313-27,128,654              | NCBI37/mm9   |
| hDSG2    | 18     | 27315895-27316499                  | NCBI36/hg18  |
| mDsg2    | 18     | 20,708,117-20,708,439              | NCBI37/mm9   |
| hDSG3    | 18     | 27287949-27288457                  | NCBI36/hg18  |
| mDsg3    | 18     | 20,675,608-20,675,938              | NCBI37/mm9   |

**Table 2. Oligonucleotide primers for genotyping**

| Kb from TSS | Forward primer (5'-3')   | Reverse primer (5'-3')    |
|-------------|--------------------------|---------------------------|
| p63wt       | GTCTGACCTCCCGACCCACCTCCT | GCATGATGAGCAGCCCAACCTTGCT |
| p63 mut     | GTCTGACCTCCCGACCCACCTCCT | GCATGATGAGCAGCCCAACCTTGCA |

**Table 3. Oligonucleotide primers for Real Time RT-PCR on mouse samples.**

| Gene           | Forward primer (5'-3')         | Reverse primer (5'-3')      |
|----------------|--------------------------------|-----------------------------|
| $\beta$ -actin | CTAAGGCCAACCGTGAAAAGAT         | GCCTGGATGGCTACGTACATG       |
| Dsc1           | CTTTTCTTTCTCCTGGTTCTGGTAT<br>T | GAGGGAACGTGAAGGGAAACT       |
| Dsc3           | CCACCGTCTCTCACTACATGGA         | TGTCCTGAACTTTCATTATCAGTTTGT |
| Dsg1           | TCACCCCCTTTTTCATTATCTACTG      | GTGGATTCTCCAAGTCTTGACCTT    |
| Dsg3           | TTTGCAAAACCCTGCAGAGA           | CTGAAGTGATCTTGGAATTGG       |
| Dsp            | CACCGTCAACGACCAGAACTC          | GATGGTGTCTGATTCTGATGTCTAGA  |
| Pkg            | TTCCGGCTCAACACCATTC            | CGCTGGATGTTCTCCACAGA        |
| Pkp3           | CAAAAATGTTACAGGGATCCTATG<br>G  | GGCGAGGCGGTCCTTTAG          |
| P63wt          | GTCTGACCTCCCGACCCACCTCCT       | GCATGATGAGCAGCCCAACCTTGCT   |

|        |                          |                           |
|--------|--------------------------|---------------------------|
| P63mut | GTCTGACCTCCCGACCCACCTCCT | GCATGATGAGCAGCCCAACCTTGCA |
| EGFR   | CCACACTGCTGGTGTGCTG      | TTGGCAGACTTTCTTTTCCTCC    |
| CTNNB1 | TAAACTCCTGCACCCACCAT     | AGGGCAAGGTTTCGAATCAA      |
| CDH3   | CCATCACCCTCACCAGAGA      | CCTCAAATCCAAACCCTTCTTG    |

**Table 3. Oligonucleotide primers for Real Time RT-PCR on human samples**

| Gene  | Forward primer (5'-3')     | Reverse primer (5'-3')     |
|-------|----------------------------|----------------------------|
| RPLP0 | GACGGATTACACCTTCCCACTT     | GGCAGATGGATCAGCCAAGA       |
| Dsc1  | GAGCATTGACCGTGAGAAATATGA   | GCCATCTGCAGTTGTTGCAT       |
| Dsc3  | TGAAAATGACAACCACCCTGTTT    | CCCCCACTGTAGTACCAGGTCTA    |
| Dsg1  | CCACCTGATAACGCAAATATAATTGA | TTGCATTTCTCTGCCACCATAC     |
| Dsg3  | CCTGCCGTATGGAGTATCACA      | GGTATCTGTTCTGGGCTCTGA      |
| Dsp   | TGCGAGCAGAGCTCATCGT        | CGAGTCAGTTGTATTCCATCTCCAT  |
| Pkg   | AGGAGAGCAAGCTGATCATCCT     | CCAGAGCAGCTTTTCATAACTGTAGT |

**Table 4. Oligonucleotide Primers for ChIP analysis on mouse genomic DNA**

| SET      | Kb from TSS | Forward primer (5'-3')      | Reverse primer (5'-3')         |
|----------|-------------|-----------------------------|--------------------------------|
| Dsp      | Intr.1      | GCAGGGAGGAACCCCAAATA        | CACACCACAGGAAAGCGTTTT          |
| Dsc3     | 24 up       | TCCAGGCGTCAAATGCATT         | AGGACATGCAGGGTGTGGAT           |
| Dsc3 (1) | 5'UTR       | GCCAGGAGCGGTGTTC            | CAGCGTCTCCTTGGTCCAA            |
| Dsg3     | Intr.1      | CCTGCCTGGGAAGGTAGGA         | TACAAGCTCTGAGGAGAATGAGTC<br>TT |
| Dsg1c    | 18 up       | TTTGCAAGGCCCAAACATG         | CGGACTTACTGCGGGTTAG            |
| Dsg2     | 8 up        | ATGCTGGTCTTTGAGCAGTTTC<br>T | TGCCCTTACCTTGGCAACAT           |

**Table 5. Oligonucleotide primers for pGL3-Dsc3-Luc and pGL3-Dsp-Luc cloning**

| SET               | Forward primer (5'-3') | Reverse primer (5'-3')  |
|-------------------|------------------------|-------------------------|
| Dsp-p63 BS Kpn F  | AGCTTGGTACCCCTGTACGTGT | AGCTTGAGCTCGTACCCTGGGTT |
| Dsp p63 BS SacI R | TAGGACAACAGAT          | ACAAGCAAAC              |
| Dsc3-p63BS Kpn F  | AGCTTGGTACCACATTCAGACA | AGCTTGAGCTCCCTTCCAGTTAC |
| Dsc3-p63BS SacI R | GACACACACACAC          | TTAGGCTTGAAA            |



**Table 6. Oligonucleotide primers for mutagenesis of the p63-binding site in *Dsc3* and *Dsp* regulatory regions**

| <b>Kb from TSS</b> | <b>Forward primer (5'-3')</b>                           | <b>Reverse primer (5'-3')</b>          |
|--------------------|---------------------------------------------------------|----------------------------------------|
| 24 up of Dsc3      | CCTCACCCACACTCAG <u><b>GG</b></u> GAGTG<br>CTGGCTTGTGG* | CCAACAAGCCAGCACTCCCTGAGT<br>GTGGGTGAGG |
| 11 down of Dsc3    | CGTTATCCACACCCTG <u><b>GG</b></u> TGTCC<br>TGACCTGCAGG* | CCTGCAGGTCAGGACACCCAGGGT<br>GTGGATAACG |

\* underlined in bold is the 2bp mutation. The p63-binding core CTAG (*Dsc3*) and CATG (*Dsp*) was mutated in GGAG.
